# Supplementary material for: Investigation of CoCr Dental Alloy: Example from a Casting Workflow Standpoint
Source: MDPI journal article supplement (doi:10.3390/cryst11080849), 2021-07-22
Supplement: s1 [file s1]

## Article

# Investigation of CoCr Dental Alloy: Example from a Casting Workflow Standpoint

Dragana Majerić <sup>1</sup>, Vojkan Lazić <sup>1</sup>, Peter Majerić <sup>2,3</sup> Aleksa Marković <sup>1</sup> and Rebeka Rudolf <sup>2,3,\*</sup>

<sup>1</sup> School of Dental Medicine, University of Belgrade, dr. Subotića 8, 11000 Belgrade, Serbia; dragana.smiljanic.989@gmail.com (M.G.); Vojkan.Lazic@stomf.bg.ac.rs (V.L.); aleksa.markovic@stomf.bg.ac.rs (A.M.)

<sup>2</sup> Faculty of Mechanical Engineering, University of Maribor, Smetanova 17, 2000 Maribor, Slovenia; peter.majeric@um.si or peter.majeric@zlatarnacelje.si

<sup>3</sup> Zlatarna Celje d.o.o., Kersnikova ulica 19, 3000 Celje, Slovenia

\* Correspondence: rebeka.rudolf@um.si or rebeka.rudolf@zlatarnacelje.si; Tel.: +386-2220-7865

Structure data for detected phases, output generated by CrystalDiffract 6 for macOS

Copyright (c) 1996–2021 CrystalMaker Software Limited (crystallmaker.com)

\*\*\*\*\*

## Cr-alpha

| h | k | l | d(A)   | 2 theta | Lp   | F(Re) | F(Im) | Intensity                 |
|---|---|---|--------|---------|------|-------|-------|---------------------------|
| 1 | 1 | 0 | 2.0392 | 44.3847 | 2.86 | 33.45 | 0.00  | $-2.43949 \times 10^{02}$ |
| 2 | 0 | 0 | 1.4419 | 64.5756 | 1.23 | 27.19 | -0.00 | $3.46093 \times 10^{01}$  |
| 2 | 1 | 1 | 1.1773 | 81.7218 | 0.79 | 23.32 | -0.00 | $6.53830 \times 10^{01}$  |
| 2 | 2 | 0 | 1.0196 | 98.1266 | 0.68 | 20.71 | -0.00 | $2.22948 \times 10^{01}$  |

## Cr<sub>2</sub>O<sub>3</sub>

| h  | k  | l | d(A)   | 2theta  | Lp    | F(Re)  | F(Im) | Intensity                |
|----|----|---|--------|---------|-------|--------|-------|--------------------------|
| 1  | 1  | 0 | 3.6307 | 24.4967 | 10.39 | -31.22 | 0.00  | $2.38527 \times 10^{01}$ |
| 2  | 1  | 1 | 2.6646 | 33.6041 | 5.29  | -54.72 | 0.00  | $3.73345 \times 10^{01}$ |
| 1  | -1 | 0 | 2.4799 | 36.1904 | 4.50  | 56.55  | 0.00  | $3.39098 \times 10^{01}$ |
| 2  | 1  | 0 | 2.1753 | 41.4726 | 3.33  | 25.94  | 0.00  | $1.05505 \times 10^{01}$ |
| 2  | 2  | 0 | 1.8153 | 50.2126 | 2.16  | -53.50 | 0.00  | $1.45705 \times 10^{01}$ |
| 3  | 2  | 1 | 1.6724 | 54.8480 | 1.77  | 62.98  | -0.00 | $3.30325 \times 10^{01}$ |
| 3  | 1  | 0 | 1.4648 | 63.4487 | 1.28  | -44.42 | 0.00  | $1.18567 \times 10^{01}$ |
| -2 | 1  | 1 | 1.4318 | 65.0911 | 1.21  | 73.41  | -0.00 | $1.53163 \times 10^{01}$ |
| 4  | 3  | 3 | 1.2956 | 72.9531 | 0.96  | -51.75 | 0.00  | $6.02701 \times 10^{00}$ |

**Co**

| h | k | l | d(A)   | 2theta  | Lp   | F(Re) | F(Im) | Intensity                |
|---|---|---|--------|---------|------|-------|-------|--------------------------|
| 1 | 1 | 1 | 2.0548 | 44.0308 | 2.91 | 78.39 | −0.00 | $2.57463 \times 10^{02}$ |
| 2 | 0 | 0 | 1.7795 | 51.2967 | 2.06 | 73.36 | −0.00 | $1.19589 \times 10^{02}$ |
| 2 | 2 | 0 | 1.2583 | 75.4884 | 0.90 | 59.04 | −0.00 | $6.74723 \times 10^{01}$ |
| 3 | 1 | 1 | 1.0731 | 91.7454 | 0.70 | 51.94 | −0.00 | $8.12530 \times 10^{01}$ |

**SiO<sub>2</sub>**

| h  | k  | l | d(A)   | 2theta  | Lp    | F(Re)  | F(Im) | Intensity                |
|----|----|---|--------|---------|-------|--------|-------|--------------------------|
| 1  | −1 | 0 | 4.2522 | 20.8726 | 14.51 | −14.70 | 0.00  | $5.41335 \times 10^{00}$ |
| −1 | 1  | 1 | 3.3408 | 26.6602 | 8.69  | −13.18 | 22.82 | $1.04201 \times 10^{01}$ |
| −2 | 1  | 2 | 1.8164 | 50.1815 | 2.16  | 26.28  | 3.68  | $2.63108 \times 10^{00}$ |
| −2 | 2  | 3 | 1.3738 | 68.2057 | 1.09  | 35.06  | −0.00 | $2.31840 \times 10^{00}$ |

**Co<sub>0.8</sub>Cr<sub>0.2</sub>**

| h | k  | l | d(A)   | 2theta  | Lp   | F(Re)  | F(Im) | Intensity                |
|---|----|---|--------|---------|------|--------|-------|--------------------------|
| 1 | −1 | 0 | 2.1824 | 41.3345 | 3.35 | −19.52 | 0.01  | $5.61934 \times 10^{01}$ |
| 0 | 0  | 2 | 2.0310 | 44.5741 | 2.83 | −37.88 | 0.00  | $5.95302 \times 10^{01}$ |
| 1 | −1 | 1 | 1.9225 | 47.2381 | 2.48 | 32.00  | −0.01 | $2.23480 \times 10^{02}$ |
| 1 | −1 | 2 | 1.4868 | 62.4055 | 1.32 | 16.03  | −0.01 | $2.98823 \times 10^{01}$ |
| 2 | −1 | 0 | 1.2600 | 75.3685 | 0.90 | 28.56  | −0.02 | $3.22420 \times 10^{01}$ |
| 1 | −1 | 3 | 1.1506 | 84.0511 | 0.76 | −23.03 | 0.01  | $3.53948 \times 10^{01}$ |
